# Supplementary material for: Discrimination of cell-intrinsic and environment-dependent effects of natural genetic variation on Kupffer cell epigenomes and transcriptomes
Source: PubMed Central journal article supplement (PMC10602851; doi:10.1038/s41590-023-01631-w), 2023-09-21
Supplement: 41590_2023_1631_MOESM9_ESM.pdf [file 41590_2023_1631_MOESM9_ESM.pdf]

Figure 3e

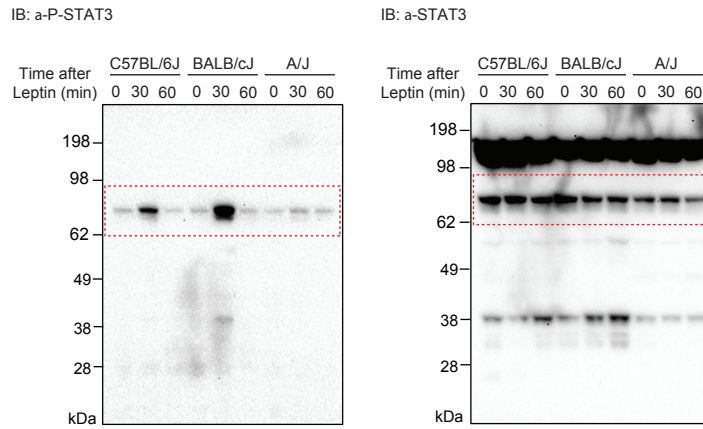

Uncropped images of immunoblots

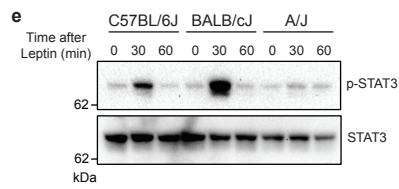

Cropped version in Figure 3e
